# Supplementary material for: Evaluation of telemedicine for new outpatient neurological consultations
Source: HighWire-hosted journal article supplement (doi:10.1136/bmjno-2021-000260), 2022-05-01
Supplement: bmjno-2021-000260supp001_data_supplement.pdf [file bmjno-2021-000260supp001_data_supplement.pdf]

## Supplemental Material

Supplemental Table 1: Number of new neurological consultations

|                         | YEAR 2019           | YEAR 2020         | Total        | P-value |
|-------------------------|---------------------|-------------------|--------------|---------|
| <b>Total Number (%)</b> | <b>1,110 (56.8)</b> | <b>845 (43.2)</b> | <b>1,955</b> |         |
| June <sup>#</sup>       | 216 (19.5)          | 166 (19.6)        | 382 (19.5)   |         |
| July <sup>#</sup>       | 179 (16.1)          | 106 (12.5)        | 285 (14.6)   |         |
| August                  | 254 (22.1)          | 136 (16.1)        | 381 (19.5)   |         |
| September               | 229 (20.6)          | 236 (27.9)        | 465 (23.8)   |         |
| October                 | 241 (21.7)          | 201 (23.8)        | 442 (22.6)   |         |
| <b>Clinic Type</b>      |                     |                   |              |         |
| Non-virtual             | 1109 (99.9)         | 227 (26.9)        |              | <0.001  |
| Virtual                 | 1 (0.1)             | 618 (73.1)        |              |         |
| <b>Mean age (±SD)</b>   |                     |                   |              |         |
| (years)                 | 50.7±17.0           | 49.7±17.1         | 50.3±17.0    | 0.176   |
| <b>Gender</b>           |                     |                   |              |         |
| Female                  | 661 (59.6)          | 488 (57.8)        | 1,149 (58.8) | 0.424   |
| Male                    | 449 (40.4)          | 357 (42.2)        | 806 (41.2)   |         |

<sup>#</sup> Patient data were extracted for these two months for further analysis

### Supplemental Figure 1: Proportion of virtual to non-virtual clinics over 13 months (June 2020 – June 2021)

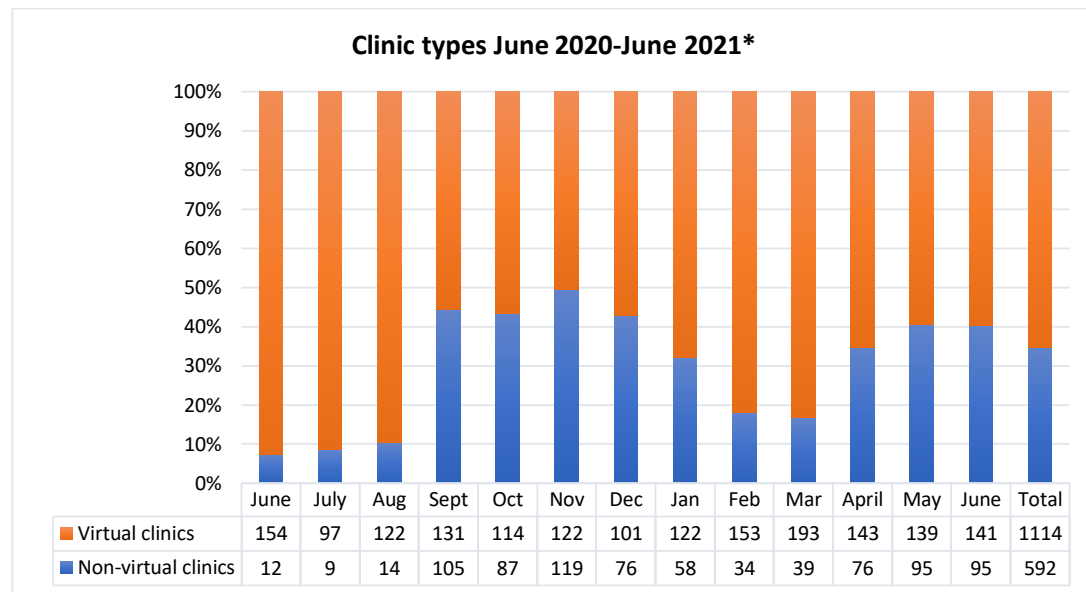

\*Overall, two-thirds (65.3%) were virtual clinics, out of which 252 (22.6%) were telephone consultations

**Supplemental Figure 2: Neurological diagnosis over the recruitment period**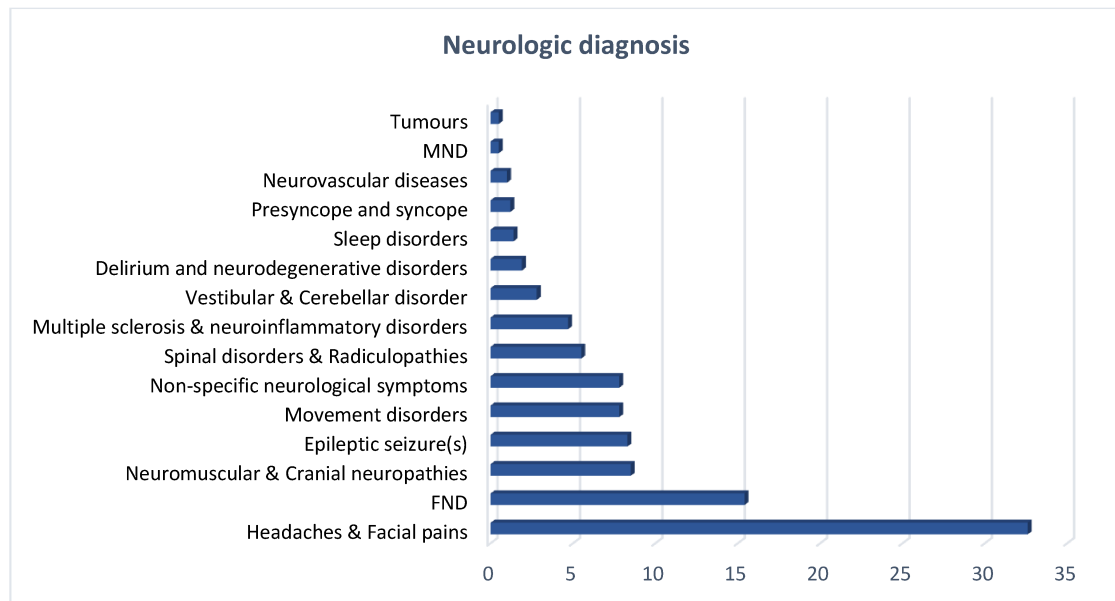

**Supplemental Table 2: Comparing non-virtual (2019) and virtual clinics (2020)**

|                                     | <b>Non virtual<br/>(N=352)</b> | <b>Virtual (N=225)</b>  | <b>RR (95%CI)/P-value</b> |
|-------------------------------------|--------------------------------|-------------------------|---------------------------|
| June                                | 191 (54.3)                     | 129 (57.3)              | 0.469                     |
| July                                | 161 (45.7)                     | 96 (42.7)               |                           |
| <b>Age</b>                          |                                |                         |                           |
| Mean                                | 50.4±17.7                      | 49.6±15.7               | 0.564                     |
| Range                               | 16-94                          | 16-88                   |                           |
| Median (IQR)                        | 50 (37-64)                     | 49 (39-60)              |                           |
| <b>Age Group</b>                    |                                |                         |                           |
| 16-24 years                         | 32 (9.1)                       | 14 (6.2)                | 0.027                     |
| 25-39 years                         | 73 (20.7)                      | 46 (20.4)               |                           |
| 40-59 years                         | 125 (35.5)                     | 106 (47.1) <sup>#</sup> |                           |
| ≥60 years                           | 122 (34.7)                     | 59 (26.2) <sup>#</sup>  |                           |
| <b>Gender</b>                       |                                |                         |                           |
| Female                              | 228 (64.8)                     | 132 (58.7)              | 0.140                     |
| Male                                | 124 (35.2)                     | 93 (41.3)               |                           |
| <b>Health Board</b>                 |                                |                         |                           |
| Grampian                            | 340 (96.6)                     | 211 (93.8)              | 0.112                     |
| Others*                             | 12 (3.4)                       | 14 (6.2)                |                           |
| <b>Referral Source</b>              |                                |                         |                           |
| GP                                  | 298 (84.7)                     | 181 (80.4)              | 0.412                     |
| CATH <sup>a</sup>                   | 52 (14.7)                      | 42 (18.7)               |                           |
| Other health professionals          | 2 (0.6)                        | 2 (0.9)                 |                           |
| <b>Time to consultation (days)</b>  |                                |                         |                           |
| Mean ± SD                           | 102.9 ± 51.9                   | 91.9 ± 70.0             |                           |
| Median (IQR)                        | 120 (51-136)                   | 114 (11-154)            | 0.152                     |
| Range                               | 0-336                          | 1-223                   |                           |
| <b>Time to consultation (weeks)</b> |                                |                         |                           |
| < 1 week                            | 11 (3.2)                       | 38 (16.9)               | <0.0001                   |
| >1 to 4 weeks                       | 13 (3.8)                       | 45 (20.0)               |                           |
| >4 weeks to 12 weeks                | 106 (30.6)                     | 10 (4.4)                |                           |
| >12 to 24 weeks                     | 198 (57.2)                     | 93 (41.3)               |                           |
| >24 weeks                           | 18 (5.2)                       | 39 (17.3)               |                           |
| <b>Referral priority</b>            |                                |                         |                           |

|                                      |             |             |                          |
|--------------------------------------|-------------|-------------|--------------------------|
| Routine                              | 278 (79.0)  | 161 (71.6)  | 1.27 (1.02-1.57); 0.042  |
| Urgent                               | 74 (21.0)   | 64 (28.4)   |                          |
| <b>Time to diagnosis (days)</b>      |             |             |                          |
| Mean ± SD                            | 12.6 ± 39.5 | 22.1 ± 57.7 |                          |
| Median (IQR)                         | 0 (0-0)     | 0 (0-0)     | 0.019                    |
| Range                                | 0-201       | 0-287       |                          |
| <b>Time to diagnosis (weeks)</b>     |             |             |                          |
| < 1 week                             | 309 (87.8)  | 182 (81.6)  | 0.069                    |
| >1 to 4 weeks                        | 7 (2.0)     | 5 (2.2)     |                          |
| >4 weeks to 12 weeks                 | 9 (2.6)     | 12 (5.4)    |                          |
| >12 to 24 weeks                      | 16 (4.6)    | 8 (3.6)     |                          |
| >24 weeks                            | 11 (3.1)    | 16 (7.2)    |                          |
| <b>Number of investigations</b>      |             |             |                          |
| Mean ± SD                            | 1.17 ± 1.16 | 0.98 ± 0.97 |                          |
| Median (IQR)                         | 1 (0-2)     | 1 (0-2)     | 0.115                    |
| Range                                | 0-5         | 0-4         |                          |
| <b>Required reassessment</b>         |             |             |                          |
| No                                   | 313 (88.9)  | 171 (76.0)  | 2.17 (1.49-3.16); <0.001 |
| Yes                                  | 39 (11.1)   | 54 (24.0)   |                          |
| <b>Required re-investigation</b>     |             |             |                          |
| No                                   | 326 (92.6)  | 193 (88.9)  | 1.50 (0.88-2.54); 0.133  |
| Yes                                  | 26 (7.4)    | 24 (11.1)   |                          |
| <b>Treatment offered</b>             |             |             |                          |
| No                                   | 181 (51.4)  | 113 (50.5)  | 1.02 (0.86-1.2); 0.820   |
| Yes                                  | 171 (48.6)  | 111 (49.5)  |                          |
| <b>Neurologic diagnosis</b>          |             |             |                          |
| Headaches & facial pains             | 114 (32.4)  | 74 (32.9)   | 0.295                    |
| FND                                  | 60 (17.1)   | 29 (12.9)   |                          |
| Neuromuscular & cranial neuropathies | 29 (8.2)    | 20 (8.9)    |                          |
| Epileptic seizures                   | 22 (6.5)    | 26 (11.6)   |                          |
| Movement disorders                   | 28 (8.0)    | 17 (7.6)    |                          |
| Non-specific neurological symptoms   | 25 (7.1)    | 20 (8.9)    |                          |
| Spinal disorders & radiculopathies   | 23 (6.5)    | 9 (4.0)     |                          |

|                                                  |          |         |
|--------------------------------------------------|----------|---------|
| Multiple sclerosis & neuroinflammatory disorders | 18 (5.1) | 9 (4.0) |
| Vestibular & cerebellar disorder                 | 9 (2.6)  | 7 (3.1) |
| Delirium & neurodegenerative disorders           | 8 (2.3)  | 3 (1.3) |
| Sleep disorders                                  | 4 (1.1)  | 4 (1.8) |
| Presyncope & syncope                             | 2 (0.6)  | 5 (2.2) |
| Neurovascular diseases                           | 5 (1.4)  | 1 (0.4) |
| Motor neuron disease                             | 3 (0.9)  | 0 (0.0) |
| Tumours                                          | 2 (0.6)  | 1 (0.4) |

---

#Significant difference in a post-hoc analysis; \*Fife, Shetland, Orkney, Fort valley, Highland, Lanarkshire & Tayside; <sup>c</sup>Consultant at this Health Board; <sup>β</sup>Six missing in 2019 and one missing in 2019

**Supplemental Table 3: Factors associated with reassessment**

|                                                 | Required reassessment |             | Relative risk (RR) | P-value |
|-------------------------------------------------|-----------------------|-------------|--------------------|---------|
|                                                 | No (n=484)            | Yes (n=93)  |                    |         |
| <b>Clinic type</b>                              |                       |             |                    |         |
| Non-virtual (2019)                              | 313 (64.7)            | 39 (42.4)   | 2.17 (1.49-3.16)   | P<0.001 |
| Virtual                                         | 171 (35.3)            | 53 (57.6)   |                    |         |
| <b>Virtual clinic type</b>                      |                       |             |                    |         |
| Near-Me                                         | 158 (92.4)            | 49 (90.7)   | 1.17 (0.54-2.57)   | 0.696   |
| Telephone                                       | 13 (7.6)              | 5 (9.3)     |                    |         |
| <b>Gender</b>                                   |                       |             |                    |         |
| Male                                            | 303 (62.6)            | 56 (60.9)   | 0.95 (0.65-1.40)   | 0.704   |
| Female                                          | 181 (37.4)            | 36 (39.1)   |                    |         |
| <b>Age</b>                                      |                       |             |                    |         |
| Mean ± SD                                       | 49.6 ± 17.2           | 52.7 ± 14.7 |                    | 0.102   |
| Median (IQR)                                    | 49 (37-62)            | 53 (43-64)  |                    |         |
| Range                                           | 16 – 94               | 18 – 82     |                    |         |
| <b>Referral priority</b>                        |                       |             |                    |         |
| Routine                                         | 372 (76.9)            | 67 (72.0)   | 1.23 (0.82-1.86)   | 0.319   |
| Urgent                                          | 112 (23.1)            | 26 (28.0)   |                    |         |
| <b>Required re-investigation</b>                |                       |             |                    |         |
| No                                              | 472 (97.7)            | 47 (54.7)   | 8.61 (6.32-11.74)  | <0.001  |
| Yes                                             | 11 (2.3)              | 39 (45.3)   |                    |         |
| <b>Treatment offered</b>                        |                       |             |                    |         |
| No                                              | 252 (52.1)            | 42 (45.7)   | 1.24 (0.85-1.81)   | 0.259   |
| Yes                                             | 232 (47.9)            | 50 (54.3)   |                    |         |
| <b>Neurologic Diagnosis*</b>                    |                       |             |                    |         |
| <b>Headaches &amp; Facial pains</b>             |                       |             |                    |         |
| No                                              | 305 (63.0)            | 84 (90.3)   | 0.22 (0.11-0.43)   | <0.001  |
| Yes                                             | 179 (37.0)            | 9 (9.7)     |                    |         |
| <b>Functional Neurological Disorder</b>         |                       |             |                    |         |
| No                                              | 414 (85.5)            | 74 (79.6)   | 1.41 (0.90-2.21)   | 0.145   |
| Yes                                             | 70 (14.5)             | 19 (20.4)   |                    |         |
| <b>Neuromuscular &amp; cranial neuropathies</b> |                       |             |                    |         |
| No                                              | 446 (92.8)            | 82 (88.2)   | 1.45 (0.83-2.52)   | 0.208   |

|                                                             |            |           |                  |       |
|-------------------------------------------------------------|------------|-----------|------------------|-------|
| Yes                                                         | 38 (7.8)   | 11 (1.8)  |                  |       |
| <b>Epileptic seizures</b>                                   |            |           |                  |       |
| No                                                          | 439 (90.7) | 90 (96.8) | 0.37 (0.12-1.12) | 0.052 |
| Yes                                                         | 45 (9.3)   | 3 (3.2)   |                  |       |
| <b>Movement disorders</b>                                   |            |           |                  |       |
| No                                                          | 448 (92.6) | 84 (90.3) | 1.27 (0.68-2.35) | 0.461 |
| Yes                                                         | 36 (7.4)   | 9 (9.7)   |                  |       |
| <b>Non-specific neurological symptoms</b>                   |            |           |                  |       |
| No                                                          | 451 (93.2) | 81 (87.1) | 1.75 (1.04-2.96) | 0.045 |
| Yes                                                         | 33 (6.8)   | 12 (12.9) |                  |       |
| <b>Spinal disorders &amp; radiculopathies</b>               |            |           |                  |       |
| No                                                          | 463 (95.7) | 82 (88.2) | 2.28 (1.36-3.84) | 0.004 |
| Yes                                                         | 21 (4.3)   | 11 (11.8) |                  |       |
| <b>Multiple sclerosis &amp; neuroinflammatory disorders</b> |            |           |                  |       |
| No                                                          | 446 (96.3) | 84 (90.3) | 2.18 (1.24-3.85) | 0.013 |
| Yes                                                         | 18 (3.7)   | 9 (9.7)   |                  |       |
| <b>Vestibular &amp; cerebellar disorder</b>                 |            |           |                  |       |
| No                                                          | 472 (97.5) | 89 (95.7) | 1.58 (0.66-3.76) | 0.327 |
| Yes                                                         | 12 (2.5)   | 4 (4.3)   |                  |       |

---

\*Other neurologic disorders listed have small sample sizes and not included in the analysis



**Supplemental Table 4: Factors associated with re-investigation**

|                                                 | Required re-investigation |             | Relative risk (RR) | P-value |
|-------------------------------------------------|---------------------------|-------------|--------------------|---------|
|                                                 | No (n=519)                | Yes (n=50)  |                    |         |
| <b>Clinic type</b>                              |                           |             |                    |         |
| Non-virtual (2019)                              | 326 (62.8)                | 26 (52.0)   | 1.49 (0.88-2.54)   | 0.133   |
| Virtual                                         | 193 (37.2)                | 24 (48.0)   |                    |         |
| <b>Virtual clinic type</b>                      |                           |             |                    |         |
| Near-Me                                         | 180 (93.3)                | 20 (83.3)   | 2.35 (0.91-6.10)   | 0.088   |
| Telephone                                       | 13 (6.7)                  | 4 (16.7)    |                    |         |
| <b>Gender</b>                                   |                           |             |                    |         |
| Female                                          | 330 (63.6)                | 26 (52.0)   | 0.65 (0.38-1.10)   | 0.106   |
| Male                                            | 189 (36.4)                | 24 (48.0)   |                    |         |
| <b>Age</b>                                      |                           |             |                    |         |
| Mean ± SD                                       | 49.5 ± 17.2               | 56.5 ± 14.7 |                    |         |
| Median (IQR)                                    | 49 (36-62)                | 56 (45-66)  |                    | 0.006   |
| Range                                           | 16 – 94                   | 15 – 82     |                    |         |
| <b>Referral priority</b>                        |                           |             |                    |         |
| Routine                                         | 399 (76.9)                | 35 (70.0)   | 1.38 (0.78-2.44)   | 0.275   |
| Urgent                                          | 120 (23.1)                | 15 (30.0)   |                    |         |
| <b>Treatment offered</b>                        |                           |             |                    |         |
| No                                              | 266 (51.2)                | 22 (44.0)   | 1.30 (0.76-2.22)   | 0.327   |
| Yes                                             | 253 (48.8)                | 28 (56.0)   |                    |         |
| <b>Neurologic Diagnosis*</b>                    |                           |             |                    |         |
| <b>Headaches &amp; Facial pains</b>             |                           |             |                    |         |
| No                                              | 334 (64.4)                | 47 (94.0)   | 0.13 (0.04-0.41)   | <0.001  |
| Yes                                             | 185 (35.6)                | 3 (6.0)     |                    |         |
| <b>Functional neurologic disorder</b>           |                           |             |                    |         |
| No                                              | 441 (85.0)                | 40 (80.0)   | 1.37 (0.71-2.63)   | 0.353   |
| Yes                                             | 78 (15.0)                 | 10 (20.0)   |                    |         |
| <b>Neuromuscular &amp; cranial neuropathies</b> |                           |             |                    |         |
| No                                              | 479 (92.3)                | 43 (86.0)   | 1.81 (0.86-3.79)   | 0.123   |
| Yes                                             | 40 (7.7)                  | 7 (14.0)    |                    |         |
| <b>Epileptic seizures</b>                       |                           |             |                    |         |
| No                                              | 472 (90.9)                | 49 (98.0)   | 0.22 (0.03-1.57)   | 0.086   |

|                                                             |            |           |                  |         |
|-------------------------------------------------------------|------------|-----------|------------------|---------|
| Yes                                                         | 47 (9.1)   | 1 (2.0)   |                  |         |
| <b>Movement disorders</b>                                   |            |           |                  |         |
| No                                                          | 479 (92.3) | 46 (92.0) | 1.04 (0.39-2.75) | 0.941   |
| Yes                                                         | 40 (7.7)   | 4 (8.0)   |                  |         |
| <b>Non-specific neurological symptoms</b>                   |            |           |                  |         |
| No                                                          | 483 (93.1) | 43 (86.0) | 1.99 (0.95-4.16) | 0.071   |
| Yes                                                         | 36 (9.4)   | 7 (14.0)  |                  |         |
| <b>Spinal disorders &amp; radiculopathies</b>               |            |           |                  |         |
| No                                                          | 492 (94.8) | 47 (94.0) | 1.14 (0.38-3.47) | 0.810   |
| Yes                                                         | 27 (5.2)   | 3 (6.0)   |                  |         |
| <b>Multiple sclerosis &amp; neuroinflammatory disorders</b> |            |           |                  |         |
| No                                                          | 500 (96.3) | 42 (84.0) | 3.82 (2.00-7.32) | <0.0001 |
| Yes                                                         | 19 (3.7)   | 8 (16.0)  |                  |         |
| <b>Vestibular &amp; cerebellar disorder</b>                 |            |           |                  |         |
| No                                                          | 504 (97.1) | 49 (98.0) | 0.71 (0.10-4.79) | 0.716   |
| Yes                                                         | 15 (2.9)   | 1 (2.0)   |                  |         |

---

\*Other neurologic disorders listed have small sample sizes and not included in the analysis

**Supplemental Table 5: A univariate sub-analysis of factors associated with reassessment for virtual cases (2020) only**

|                                  | Required re-assessment |                 |                  |         |
|----------------------------------|------------------------|-----------------|------------------|---------|
|                                  | No (n=171)             | Yes (n=54)      | Risk ratio (RR)  | P-value |
| <b>Gender</b>                    |                        |                 |                  |         |
| Male                             | 101 (59.1)             | 31 (57.4)       | 0.95 (0.59-1.52) | 0.829   |
| Female                           | 70 (40.9)              | 23 (42.6)       |                  |         |
| <b>Age</b>                       |                        |                 |                  |         |
| Mean $\pm$ SD                    | 48.3 $\pm$ 15.8        | 53.8 $\pm$ 14.4 |                  |         |
| Median (IQR)                     | 48 (37-60)             | 54 (46-63)      |                  | 0.028   |
| Range                            | 16-88                  | 23-82           |                  |         |
| <b>Health Board</b>              |                        |                 |                  |         |
| Grampian                         | 159 (93.0)             | 52 (96.3)       |                  | 0.380   |
| Others                           | 12 (7.0)               | 2 (3.7)         |                  |         |
| <b>Referral priority</b>         |                        |                 |                  |         |
| Routine                          | 125 (73.1)             | 36 (66.7)       | 1.26 (0.77-2.05) | 0.361   |
| Urgent                           | 46 (26.9)              | 18 (33.3)       |                  |         |
| <b>Virtual clinic type</b>       |                        |                 |                  |         |
| Near-Me                          | 158 (92.4)             | 49 (90.7)       | 1.17 (0.54-2.57) | 0.696   |
| Telephone                        | 13 (7.6)               | 5 (9.3)         |                  |         |
| <b>Required re-investigation</b> |                        |                 |                  |         |
| No                               | 167 (98.2)             | 26 (55.3)       | 6.50 (4.41-9.58) | <0.001  |
| Yes                              | 3 (1.8)                | 21 (44.7)       |                  |         |
| <b>Treatment offered</b>         |                        |                 |                  |         |
| No                               | 87 (50.9)              | 26 (49.1)       | 1.05 (0.66-1.69) | 0.817   |
| Yes                              | 84 (49.1)              | 27 (50.9)       |                  |         |
| <b>Neurologic Diagnosis</b>      |                        |                 |                  |         |
| Headaches & facial pains         | 69 (40.4)              | 5 (9.3)         | 0.21 (0.09-0.50) | <0.001  |

---

|                                                  |           |           |                  |       |
|--------------------------------------------------|-----------|-----------|------------------|-------|
| Functional neurological diagnosis                | 19 (11.1) | 10 (18.5) | 1.54 (0.87-2.70) | 0.157 |
| Neuromuscular & cranial neuropathies             | 12 (7.0)  | 8 (14.8)  | 1.78 (0.98-3.23) | 0.079 |
| Epileptic seizures                               | 23 (13.5) | 3 (5.6)   | 0.45 (0.15-1.34) | 0.114 |
| Movement disorders                               | 9 (5.3)   | 8 (14.8)  | 2.13 (1.21-3.74) | 0.021 |
| Non-specific neurological symptoms               | 11 (6.4)  | 9 (16.7)  | 2.05 (1.18-3.55) | 0.021 |
| Spinal disorders & radiculopathies               | 5 (2.9)   | 4 (7.4)   | 1.92 (0.89-4.15) | 0.143 |
| Multiple sclerosis & neuroinflammatory disorders | 6 (3.5)   | 3 (5.6)   | 1.41 (0.54-3.67) | 0.503 |

---
